# Supplementary material for: Cognitive and behavioural strategies for self‐directed weight loss: systematic review of qualitative studies
Source: PubMed Central journal article supplement (PMC5408390; doi:10.1111/obr.12500), 2017-01-24

# Cognitive and behavioural strategies for self-directed weight loss: systematic review of qualitative studies

Jamie Hartmann-Boyce, Anne-Marie Boylan, Susan A. Jebb, Ben Fletcher, Paul Aveyard  
Nuffield Department of Primary Care Health Sciences, University of Oxford

**Corresponding author:** Jamie Hartmann-Boyce, Nuffield Department of Primary Care Health Sciences, University of Oxford, Radcliffe Observatory Quarter, OX2 6GG, UK. Email: [jamie.hartmann-boyce@phc.ox.ac.uk](mailto:jamie.hartmann-boyce@phc.ox.ac.uk)

Figure S1 PRISMA diagram of study flow

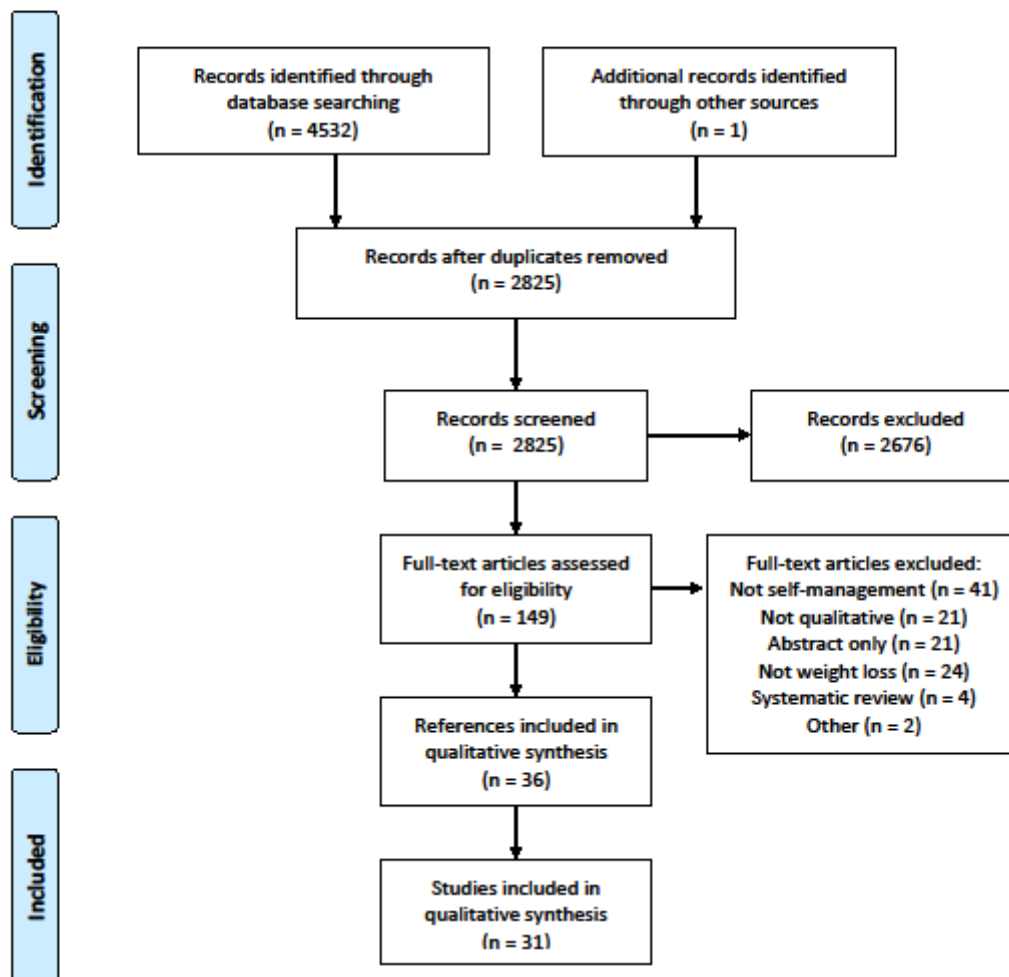

Supplement: OBR-18-335-s001.pdf [file OBR-18-335-s001.pdf]
